# Supplementary material for: Proteomic Analysis and Functional Validation of a Brassica oleracea Endochitinase Involved in Resistance to Xanthomonas campestris
Source: Front Plant Sci. 2019 Apr 12;10:414. doi: 10.3389/fpls.2019.00414 (PMC6473119; doi:10.3389/fpls.2019.00414)
Supplement: TABLE S3 — Biological process category of the identified proteins with increased and decreased abundance in both cultivars comparison (RI:RC and SI:SC), as indicated in each spreadsheet. [file Table_3.XLSX]

## Sheet: Legend Supp Table
Supplentary Table S3: Biological process category of the identified proteins with increased and decreased abundance in both cultivars comparison (RI:RC and SI:SC), as indicated in each spreadsheet.

## Sheet: BioProcess (GO)_Astrus RI-RC
	INCREASED - ASTRUS (RI:RC)
Accession¹	Protein description and GO information	Score	Fold change	Coverage (%)	#Peptides	#Unique
	METABOLISM
	Metabolic process
A0A0D3BSK2*	3-Ketoacyl- Thiolase Peroxisomal GN=106342622	815.05	2.31871	33	12	3
A0A0D3D4E9	Aconitate hydratase GN=106306006/106335251 (EC:4.2.1.3; 1.1.1.37)	468.28	1.68506	13	8	4
A0A0D3BK76		71.99	3.08798	9	6	2
A0A0D3DXW2*	Aminomethyltransferase GN=106312228	3345.23	1.74239	74	34	34
A0A0D3BPL2	Basic Endochitinase CHI-B4-like GN=CHI (EC 3.2.1.14 )	45.26	6.16151	3	1	1
A0A0D3B926*	Chitinase Domain-Containing 1-Like GN=N/A	752.75	1.86436	20	17	13
A0A0D3BUR1*	Cysteine Protease Rd21B GN=106342141	77.71	1.52893	12	4	3
A0A0D3A6M9*	Fructose-Bisphosphate Aldolase Cytosolic GN=N/A	41.72	2.07293	1	1	1
A0A0D3A0Z5*	Gamma-Glutamyltranspeptidase 1 GN=106315350	125.7	1.59468	6	2	2
A0A0D3CTF1*	Glucan Endo-1,3-Beta-Glucosidase 10 GN=106300472	174.98	1.50014	8	2	2
A0A0D3BXB6	Glucan endo-1,3-beta-glucosidase-like GN=106341843 (EC 4.1.2.13)	282.76	6.59178	20	4	4
A0A0D3A6F6*	Glucose-6-Phosphate 1-Epimerase GN=106307617	684.4	1.54962	36	7	7
A0A0D3DKT0*	Glycine Cleavage System H Mitochondrial-Like GN=106307779	588.32	1.77055	51	6	4
A0A0D3BK61*	Isocitrate Dehydrogenase [Nad] Regulatory Subunit Mitochondrial GN=106329085	86.57	1.53841	6	1	1
A0A0D3CYL6*	Lactoylglutathione Chloroplastic GN=106301107	118.43	1.62622	9	2	2
A0A0D3CQE1*	Malate dehydrogenase mitochondrial GN=106296346 (EC 1.1.1.37)	376.21	1.52621	33	8	3
A0A0D3CQE1		187.42	2.59396	50	17	1
A0A0D3CQN2*	Malate Dehydrogenase Mitochondrial-Like GN=106301033	144.34	1.87639	29	7	2
A0A0D3BMU9	Malate dehydrogenase mitochondrial GN=N/A (EC 1.1.1.37)	123.17	4.48622	45	18	2
A0A0D3CGY3	Malate dehydrogenase, chloroplastic GN=N/A (EC 1.1.1.37)	491.68	2.02901	28	13	10
A0A0D3EB81*	Rab3 Gtpase-Activating Catalytic Subunit GN=N/A	211.38	1.52224	4	4	4
A0A0D3A4N1*	Reticuline Oxidase GN=106308278	68.37	1.57808	5	2	1
A0A0D3DCB7*	Rubisco Accumulation Factor Chloroplastic GN=106306286	165	1.57353	8	3	3
A0A0D3BM52*	Serine Carboxypeptidase-Like 29 GN=106328067	238.39	1.78946	12	3	3
A0A0D3CYQ9*	Thimet Oligopeptidase GN=N/A	106.9	1.96447	3	2	2
A0A0D2ZYY2*	Venom Phosphodiesterase 2-Like GN=N/A	120.02	1.95649	15	2	2
A0A0D3C8J0*	Violaxanthin De- Chloroplastic GN=N/A	478.58	2.2781	25	7	7
	Glicolytic/glucolysis and gluconeogenesis
A0A0D3C0Z6	Fructose bisphosphate aldolase (EC 4.1.2.13)	34.48	2.14555	40	16	1
A0A0D3BSL1	Fructose-1,6- cytosolic GN=N/A (EC 3.1.3.11)	47.1	8.75638	38	7	1
A0A0D3DXN8	Glyceraldehyde-3-phosphate dehydrogenase chloroplastic GN=106308443/106319595* (EC 1.2.1.-)	95.3	1.56769	60	32	2
A0A0D3D1V1	Phosphoglycerate cytosolic GN=106300883 (EC 2.7.2.3)	46.78	1.65326	44	15	1
A0A0D3AA76	Pyruvate dehydrogenase E1 component subunit alpha- mitochondrial GN=106312421 (EC 1.2.4.1)	94.98	2.20361	9	3	2
	Biosynthetic process
A0A0D3EEL1	5-methyltetrahydropteroyltriglutamate--homocysteine methyltransferase 1-like	152.28	2.20269	33	20	1
A0A0D3E2U4	Serine--glyoxylate aminotransferase-like GN=106318812 (EC 2.6.1.45)	55.44	2.46979	32	11	1
A0A0D3B9D8	UDP-arabinopyranose mutase 1-like GN=RGP1 (EC 5.4.99.30)	51.15	8.62401	24	7	1
A0A0D3AQF1*	Strictosidine Synthase-Like 12 Isoform X2 GN=106322831	32.86	3.69359	3	1	1
A0A0D3AT44*	Nucleoside Diphosphate Kinase Chloroplastic Mitochondrial GN=106321604	201.26	1.9664	17	4	4
A0A0D3CMR2*	Zeta-Carotene Chloroplastic Chromoplastic GN=106295419	101.49	1.55792	5	2	2
	Lipid and Fatty Acid
A0A0D3AQI7*	Alpha Beta-Hydrolases Superfamily GN=N/A	341.09	1.65229	20	5	5
A0A0D3AIE0*	3-Hydroxyacyl-[Acyl-Carrier- ] Dehydratase -Like GN=106325239	44.93	1.76544	4	1	1
A0A0D3DND6*	Peroxisomal Fatty Acid Beta-Oxidation Multifunctional Aim1 GN=N/A	159.19	1.58182	7	4	4
A0A0D3BGF3*	Chloroplastic Lipocalin Isoform X1 GN=106328619	508.55	1.76003	27	8	8
	Aminoacid Metabolism
A0A0D3CZT9	Serine hydroxymethyltransferase mitochondrial GN=106300539/106335712* (EC 2.7.2.3)	90.34	1.99967	24	11	2
	PROTEIN BIOSYNTHESIS, FOLDING, ASSEMBLY, FATE AND DEGRADATION
A0A0D3AL95	26S protease regulatory subunit 6B homolog GN=106327908	254.93	1.73023	15	5	5
A0A0D3E058	Elongation factor mitochondrial GN=106315471	37.06	1.61927	18	6	1
A0A0D3CRG6	Mitochondrial-processing peptidase subunit alpha-1 GN=106301120 (EC 3.4.24.64)	21.18	12.4244	12	4	1
A0A0D3D6K0	T-complex 1 subunit epsilon GN=106306029 (EC 1.2.1.-)	45.45	4.61769	8	2	2
A0A0D3BD05*	Chaperonin Mitochondrial GN=106335219	379.63	1.58532	14	8	7
A0A0D3DNG2*	Calreticulin-3 GN=106312492	232.21	1.54957	12	4	4
A0A0D3CSF0*	Containing Pdz A K-Box And A Tpr Region GN=106300193	1439.35	1.5623	54	14	14
A0A0D3DDD9*	Photosystem Ii Stability Assembly Factor Chloroplastic GN=106303503	3603.83	1.85397	69	36	36
A0A0D3BWN2*	Peptidyl-Prolyl Cis-Trans Isomerase Fkbp20- Chloroplastic GN=106339589	53.25	1.54162	5	1	1
A0A0D3CJV9*	Peptidyl-Prolyl Cis-Trans Isomerase Family (CYP-Like) GN=106343298	797.34	1.99863	34	14	14
A0A0D3B0W7*	Photosynthetic Ndh Subunit Of Lumenal Location Chloroplastic GN=106334964	686.52	1.66052	35	9	6
	Transcription, Translation, pos-translational and Transduction process
A0A0H3Y317*	30S ribosomal protein S18 (Chloroplast) GN=rps18	64.05	1.93859	22	2	2
A0A191SEZ7*	30S ribosomal protein S7 (Chloroplast) GN=rps7	249.11	1.77097	30	4	4
RS7_BRAOL*	40S ribosomal protein S7 GN=RPS7	81.58	2.09317	22	3	2
A0A0D3DUP7*	40S Ribosomal S13-2 GN=106339452	64.44	11.4501	11	1	1
A0A0D3DZ20*	40S Ribosomal S15-1 GN=v	319	1.95577	16	3	3
A0A0D3AFN9*	40S Ribosomal S16-3-Like GN=106342925	137.1	1.88397	21	3	1
A0A0D3EHV5*	40S Ribosomal S17-4-Like GN=106313684	57.86	2.2746	8	1	1
A0A0D3CRX6*	40S Ribosomal S18 GN=N/A	119.02	2.26929	43	5	5
A0A0D3EA36*	40S Ribosomal S20-1-Like GN=106315674	50.51	1.85449	20	2	1
A0A0D3B3Y5*	40S Ribosomal S20-2 GN=106335881	140.04	2.01921	20	2	1
A0A0D3AHJ2*	40S Ribosomal S23 GN=N/A	53.23	2.22283	12	1	1
A0A0D3AX62*	40S Ribosomal S24-1 GN=106325038	159.06	1.56547	20	2	2
A0A0D3B9Q0*	40S Ribosomal S3A GN=106331381	22.96	2.20978	3	1	1
A0A0D3CL16*	40S Ribosomal S5-1-Like GN=106295787	377.06	1.69813	35	6	6
A0A0D3B1F4*	40S Ribosomal S7-3-Like GN=106331640	53.73	1.98516	9	2	1
A0A0D3EF45	40S ribosomal S7-3 GN=106317945	66.48	2.09738	17	2	2
A0A0H3XYP6*	50S ribosomal protein L22, chloroplastic) GN=rpl22	24.02	2.5533	10	3	2
A0A0D3B6F7*	50S Ribosomal L3- Chloroplastic GN=106335401	353.58	1.72988	31	9	9
A0A0D3CTS1*	50S Ribosomal Chloroplastic GN=106296865	36.97	1.79927	4	1	1
A0A0D3E7Y2*	50S Ribosomal Chloroplastic GN=106313062	318.48	1.51872	29	7	7
A0A0D3E2A7*	50S Ribosomal Chloroplastic-Like GN=N/A	112.08	2.04853	28	2	2
A0A0D3B940*	50S Ribosomal Chloroplastic GN=106331498	194.11	2.15146	19	5	5
A0A0D3A8J3*	50S Ribosomal Chloroplastic GN=106298472	124.61	4.38987	14	2	2
A0A0D3AUD9*	60S Ribosomal L11-1 GN=106322743	138.89	1.52162	18	4	4
A0A0D3A9C9*	60S Ribosomal L13-1 GN=106311292	44.83	2.06189	5	1	1
A0A0D3DBU6*	60S Ribosomal L13A-4 GN=N/A	170.68	2.53075	8	3	3
A0A0D3ANN2*	60S Ribosomal L17-2 GN=N/A	61.68	2.23023	17	3	3
A0A0D3E5R2*	60S Ribosomal L21-1-Like GN=N/A	90	1.92771	8	2	2
A0A0D3CMJ8*	60S Ribosomal L22-2-Like GN=106292862	145.91	1.61072	22	2	2
A0A0D3DRR0*	60S Ribosomal L26-1 GN=106324333	174.44	1.59557	24	4	4
A0A0D3E3I8*	60S Ribosomal L28-1-Like GN=N/A	97.75	2.32279	17	2	2
A0A0D3A400*	60S Ribosomal L32-1 GN=106304005	173.13	1.74028	16	2	2
A0A0D3AEV7*	60S Ribosomal L4-1-Like GN=106318349	182.07	1.79544	9	3	3
A0A0D3D4R1*	60S Ribosomal L5-1-Like GN=106301256	45.98	1.76451	3	1	1
A0A0D3CB93*	60S Ribosomal L6-1-Like GN=106292543	61.14	1.71608	6	1	1
A0A0D2ZSK2	ADP-ribosylation factor 1-like GN=106320540 (EC 1.2.4.1)	134.69	4.02728	15	2	2
A0A0D3E058*	Elongation factor Tu GN=106315471	149.58	3.93938	14	6	4
A0A0D3C896*	Ribosomal L4 GN=106294834	55.43	2.02462	5	1	1
A0A0D3CMU0*	Set-Domain Containing Lysine Methyltransferase Family GN=N/A	45.13	2.03335	1	1	1
A0A0D3CUU9*	Rhodanese Cell Cycle Control Phosphatase Superfamily GN=10630066	109.67	1.67241	6	2	2
A0A0D3BRM6*	Ubiquitin-60S Ribosomal L40 GN=106332046	195.85	1.76128	19	3	3
	PHOTORESPIRATION, CHLOROPLASTIC AND PHOTOSYNTHESIS PROCESS
A0A0D3CH25	ATP sulfurylase chloroplastic	401.54	1.66637	28	8	2
A0A0D2ZSK5*	Alpha beta-Hydrolases superfamily GN=106320541	192.61	1.5096	13	3	3
A0A0D3E0E6*	Light-Regulated -Like GN=106313182	162.22	1.69752	12	1	1
A0A0D3AG28*	Mitochondrial-Processing Peptidase Subunit Mitochondrial Isoform X1 GN=106341389	1083.9	1.50391	73	37	10
A0A0D3B0P4*	Nadh Dehydrogenase [Ubiquinone] Iron-Sulfur Mitochondrial GN=106335690	95.56	1.60979	28	5	1
A0A0D3A8W2*	Plastid Transcriptionally Active Chloroplastic GN=106310518	2240.13	1.62452	50	26	26
A0A0D2ZS19*	Plastid-lipid-associated chloroplastic GN=106320364	394.31	2.51483	22	8	8
A0A0D3B8J8	Plastid-Lipid-associated 1, Chloroplastic GN=106328517	20.25	2.07634	15	5	1
A0A0D3B8J8*		1073.19	1.79039	52	16	6
A0A0D3DIP9*	Protochlorophyllide Reductase Chloroplastic-Like Isoform X1 GN=N/A	121.38	1.85398	12	7	2
A0A0D3D914*	Ycf3-Interacting Chloroplastic GN=106301270	87.46	1.72494	10	1	1
A0A0D3DI26*	Oxygen-Evolving Enhancer Chloroplastic GN=106301616/106311920	516.58	1.56531	46	29	17
A0A0D3DJ65*	Oxygen-Evolving Enhancer Chloroplastic GN=106301616/106311921	6292.82	2.08848	62	69	25
A0A0D3DYQ1*	Oxygen-Evolving Enhancer Chloroplastic-Like GN=106312114	959.77	2.34575	62	54	10
A0A0D3A8H2*	Oxygen-Evolving Enhancer 1- Chloroplastic GN=N/A	13967.2	1.60035	66	107	9
A0A0D3BTD3*	Oxygen-Evolving Enhancer 2- Chloroplastic-Like GN=N/A	228.18	2.19818	17	20	4
A0A0D3A4T4*	Oxygen-Evolving Enhancer 3- Chloroplastic GN=106313966	228.29	2.96753	31	5	4
A0A0D3E811*		547.66	2.88548	33	6	5
A0A0D3CND9	Photosynthetic NDH subunit of lumenal location chloroplastic-like	176.3	1.83724	37	4	4
A0A0H3XZM8*	Photosystem II D1 (Chloroplast) GN=psbA	287.42	1.28999	19	5	5
Q6DV58*	Photosystem II protein GN=pbsO	225.99	1.69868	70	93	3
A0A0D3B7J6*	Thylakoid Lumenal 19 Kda Chloroplastic GN=106336110	920.15	2.73622	48	7	7
	DISEASE/DEFENSE RESPONSE
A0A0D3BR44	Aldo-keto reductase family 4 member C8 GN=106341758	97.88	1.57038	12	2	2
A0A0D3EHU5	Assimilatory sulfite reductase (ferredoxin) chloroplastic (EC 1.15.1.1)	136.71	2.60637	16	8	3
A0A0D3B771	Glutathione S-transferase U5 GN=106336013	428.89	2.15235	38	7	7
A0A0D3CVZ5	Glutathione S-transferase U19 (EC 2.1.2.1)	810.15	1.51033	40	9	7
A0A0D3C0C3*	50S Ribosomal Chloroplastic GN=106337149	280.49	2.72582	22	4	4
A0A0D3CYE1*	Calmodulin-1 GN=106300288	43.52	1.60888	17	2	2
A0A0D3D1T5*	Metacaspase-4 GN=106300010	105.34	2.08411	7	2	2
A0A0D3E3M6*	Nadh Dehydrogenase [Ubiquinone] 1 Alpha Subcomplex Subunit Mitochondrial-Like GN=106313530	690.75	1.69176	33	11	11
A0A0D3E8B6*	Plastid-Lipid-Associated 1, chloroplastic GN=N/A	583.57	2.18073	77	13	6
A0A0D3E8B7*	Plastid-lipid-associated protein 1, chloroplastic GN=N/A	394.63	2.00238	58	8	6
A0A0D3A546*	Plastid lipid-associated protein 2, chloroplastic GN=106292489	1478.74	1.99495	54	17	10
A0A0D3BRT9*	Plastid lipid-associated protein 3, chloroplastic GN=106342579	1367.45	2.24424	47	20	19
A0A0D3AJE9*	Binding Partner Of Acd11 1 Isoform X2 GN=N/A	48.47	2.11418	3	1	1
Q39386*	Pollen coat protein GN=N/A	203.5	5.17019	26	3	2
A0A0D3DK02*	Succinate Dehydrogenase Subunit 5 Mitochondrial-like isoform X2 GN=106309508	123.6	1.5119	13	2	2
A0A0D3CN30*	Universal Stress A GN=106292588	89.85	1.97374	11	1	1
A0A0D3CTQ3	Universal Stress YxiE-like GN=106296807	121.97	1.90839	22	2	2
A0A0D3CTQ3*	Universal Stress GN=106296807	100.17	1.73223	11	1	1
	Oxidative stress
A0A0D3BET0	14-3-3 GF14 kappa isoform X1 GN=106336315 (EC 4.2.1.3)	161.92	1.5096	29	7	1
F8U7Z7	Superoxide dismutase [Fe] chloroplastic GN=FSD1	174.08	3.09835	20	2	2
A0A0D3CDN4*	Nad(P)-Binding Rossmann-Fold Superfamily GN=106294463	594.62	1.67215	37	9	9
A0A0D3C7R8*	Peroxidase GN=106292770	166.88	1.51864	12	3	3
	Pathogen-related
I3Y171	Annexin GN=N/A	203.65	1.68515	19	5	5
A0A0D3BZV5*	Aig2 GN=106342351	131.24	1.86755	8	2	2
A0A0D3BV84*	Ferredoxin GN=106337169	386.34	2.20222	31	5	5
A0A0D3E2R1*	Ferredoxin--Nadp Leaf Isozyme 1 Chloroplastic GN=106318130	5549.51	1.48656	74	60	13
A0A0D3DQI2*	Ferredoxin--Nadp Leaf Isozyme 2 Chloroplastic GN=106307428	7671.45	1.62104	76	77	13
A0A0D3B2Z9*	Mitochondrial Outer Membrane Porin 4 GN=106331408	91.44	1.58934	7	1	1
	TRANSPORT
A0A0D3A2N7*	Atp Synthase Subunit B Chloroplastic-Like GN=N/A	454.25	1.55054	16	5	5
A0A0H3Y2E8*	ATP synthase subunit b (Chloroplast) GN=atpF	570.37	1.4556	48	8	8
A0A0D3B7W4*	Atp Synthase Subunit Chloroplastic-Like GN=106336515	959.73	1.73209	45	12	5
A0A0D3EG41*	Nadh Dehydrogenase [Ubiquinone] Iron-Sulfur Mitochondrial GN=106318474	439.69	1.61088	28	5	1
A0A0D2ZVJ9*	Outer envelope pore protein 16-1, chloroplastic GN=106321487	90.35	1.27988	22	2	2
A0A0D3DHW6*	Ras-Related Rabb1B GN=106303681	97.59	1.8769	23	3	3
A0A0D3AYU8*	Succinate Dehydrogenase [Ubiquinone] Flavo Subunit Mitochondrial-Like Isoform X1 GN=106327919	588.74	1.58059	19	8	8
A0A0D3A296*	Tic Chloroplastic-Like GN=106343670	53.46	1.87673	23	5	1
A0A0D3CIN9*	Tic Chloroplastic GN=N/A	1633.49	1.67292	42	22	22
	SIGNALING PATHWAY AND TRANSMEMBRANE RECEPTOR
A0A0D3CSX5	Leucine-rich repeat receptor-like serine threonine- kinase	44.34	2.11667	3	2	2
A0A0D3D099*	Leucine-Rich Repeat Receptor Kinase Pepr1 GN=N/A	58.06	2.68282	1	1	1
A0A0D3D0Y9*	Gibberellin-Regulated 1-Like GN=106298463	86.61	1.9739	21	3	3
A0A0D3CJY3	Lectin-like protein At3g16530 GN=106343897	43.15	1.75877	3	1	1
	DNA AND RNA BINDING/ASSEMBLY
A0A0D3E141*	Histone H2A GN=106317918	480.61	1.66763	49	15	3
A0A0D3BYR9*	Histone H3 Type 2 GN=106336903	1315.49	1.79506	65	23	10
A0A0D3DNI8*	Histone H2Axa GN=106312192	323.39	1.94657	65	14	3
	ORGANIZATION, HOMEOSTASIS, MODIFICATION AND REPAIR
A0A0D3CPQ2	Thioredoxin chloroplastic (1.1.1.37)	27.32	3.17625	8	1	1
A0A0D3CJI1*	Condensin-2 Complex Subunit H2-Like GN=106343224	20.13	2.07737	1	1	1
A0A0D3A427*	Protease Do-Like Chloroplastic GN=106301633	271.62	1.73447	24	7	5
A0A0D3DBZ4*	Protease Do-Like Chloroplastic GN=106307104	721.09	2.1152	35	11	11
A0A0D3B544*	Thioredoxin Chloroplastic-Like Isoform X1 GN=106328574	64.99	2.16946	7	1	1
A0A0D3BSM9*	Disulfide-Isomerase 2-3 GN=106336763	79.97	1.55855	3	1	1
A0A0D3CP20*	Dihydrolipoyl Dehydrogenase Mitochondrial GN=N/A	1436.55	1.39291	41	17	10
A0A0D3D1E1*	Disulfide Isomerase-Like 1-2 GN=106300838	999.66	1.85511	29	13	10
A0A0D3D7M0*	Disulfide Isomerase-Like 1-1 GN=106306794	100.81	1.55841	14	6	2
A0A0D3DSN3*	Peroxiredoxin- Chloroplastic GN=106311656	138.29	1.87946	38	8	2
A0A0D3BYD5*	Peroxiredoxin- Chloroplastic GN=106340130	407.88	1.66343	71	12	6
A0A0D2ZRQ6*	Peroxiredoxin Q, chloroplastic isoform X2 GN=106320257	626.27	1.54869	36	7	7
A0A0D3DZ53*	Thioredoxin M- chloroplastic GN= 106307865	115.19	2.26062	12	2	2
A0A0D3AA55*	Dynamin-Like 3 GN=106312261	31.16	1.87705	1	1	1
A0A0D3AUA0*	Pectin Acetylesterase 11 GN=106327349	853.46	1.60852	39	11	7
A0A0D3CBR0*	Plastocyanin GN=106296130	301.27	2.29513	28	3	3
A0A0D3DQJ6*	Plastocyanin GN=N/A	539.73	2.34201	13	3	3
A0A0D3B6U2*	Pectinesterase GN=106329510	247.8	3.65783	14	4	3
A0A0D3C7E7*	Prohibitin- Mitochondrial-Like GN=106343611	43.28	1.55929	4	1	1
A0A0D3BZW4*	Protease Do-Like Chloroplastic GN=106336631	429.88	2.69774	30	8	8
A0A0D3E3H6*	Wd-40 Repeat-Containing Msi4 GN=106313210	154.34	1.90449	6	2	2
	DEVELOPMENT GROWTH AND REPRODUCTOTION PROCESS
A0A0D3C124	Violaxanthin de- partial	27.95	3.78971	2	1	1
A0A0D3E0E3*	Eukaryotic Peptide Chain Release Factor Subunit 1-2 GN=106318979	54.1	3.13535	2	1	1
A0A0D3EH21*	Sorting Nexin 2B GN=106318239	72.46	1.88873	4	1	1
A0A0D3E2H1*	Subtilisin-Like Protease SBT1.7 GN=106313216	284.71	1.51484	9	4	4
	OXIDATION REACTION
J7GP93	Alcohol dehydrogenase class-3	239.75	2.15924	20	5	5
	NO INFORMATION
A0A0D3AX01	5 -nucleotidase domain-containing 4-like	35.35	3.61271	2	1	1
A0A0D3E4P3	Adenosine tRNA methylthiotransferase	144.71	2.05513	17	4	4
A0A0D3ECB6	PREDICTED: protein LOC106318549	118.95	3.46725	29	3	3
A0A0D2ZQS9*	Kunitz-type serine protease inhibitor -like GN=N/A	24.53	1.58829	3	1	1
A0A0D3A6Y3*	Protochlorophyllide Reductase Chloroplastic GN=N/A	228.76	1.55473	34	9	3
A0A0D3A7T8*	Pyridine Nucleotide-Disulfide Oxidoreductase Domain-Containing 2 GN=106315174	72.58	1.56018	3	1	1
A0A0D3ADG3*	Lectin At3G16530 GN=106324351	243.66	1.86656	14	2	2
A0A0D3B4B4*	Mediator Of Rna Polymerase Ii Transcription Subunit 37F-Like GN=106335110	2046.2	1.54373	50	33	3
A0A0D3B5V1*	Jacalin-Related Lectin 22 GN=106328207	204.8	2.0097	9	4	3
A0A0D3BB77*	Fluorescent In Blue Chloroplastic-Like GN=106331481	114.45	1.7768	8	2	2
A0A0D3BFI3*	Probable Inactive Purple Acid Phosphatase 29 GN=106335965	80.69	1.55275	11	2	1
A0A0D3BHQ4*	uncharacterized protein GN=106335145	86.13	2.52834	10	1	1
A0A0D3BN26*	Ribulose-1,5-Bisphosphate Carboxylase Oxygenase Large Subunit (Chloroplast) GN=N/A	25.24	1.65565	13	2	1
A0A0D3BPY9*	Thylakoid Lumenal 15 Kda Chloroplastic Isoform X2 GN=106339774	262.07	2.13758	22	3	3
A0A0D3BNP7*	Transcription Factor 25 GN=N/A	286.62	1.94905	9	7	7
A0A0D3BZ21*	Uncharacterized Protein At4G13200, Chloroplastic GN=106341851	111.34	2.2409	9	2	2
A0A0D3C4D6*	Fad-Dependent Urate Hydroxylase-Like GN=106342207	675.36	1.6867	28	13	13
A0A0D3DL33*	Peptidyl-Prolyl Cis-Trans Isomerase Chloroplastic GN=106307544	114.8	2.95814	10	2	2
A0A0D3CND6*	Peptidyl-Prolyl Cis-Trans Isomerase Chloroplastic GN=106295148	638.43	2.00995	33	9	9
A0A0D3C630*	Peptidyl-Prolyl Cis-Trans Isomerase Fkbp16- Chloroplastic-Like GN=106337573	211.66	2.86657	21	4	4
A0A0D3CLJ1*	Peptidyl-Prolyl Cis-Trans Isomerase Fkbp16- Chloroplastic GN=106292499	155.29	1.82852	13	3	3
A0A0D3CBV7*	Peptidyl-Prolyl Cis-Trans Isomerase Chloroplastic Isoform X1 GN=N/A	76.1	2.34869	3	1	1
A0A0D3DEN9*	Carboxyl-Terminal-Processing Peptidase Chloroplastic GN=106306734	105.01	1.53825	7	3	3
A0A0D3CLI8*	Heme-Binding Chloroplastic GN=N/A	81.24	1.7561	14	3	3
A0A0D3CZJ8*	Polygalacturonase 1 Beta 3 GN=106300195	56.66	1.59145	6	2	2
A0A0D3DA05*	Ribosomal L30 L7 Family GN=106301638	106.45	5.0874	11	2	1
A0A0D3DXT1*	Thylakoid Lumenal Chloroplastic GN=N/A	104.41	2.1367	6	2	1
A0A0D3EAP2*	Thylakoid lumenal 17.4 kDa protein, chloroplastic GN=106313560	35.35	2.77032	3	1	1
A0A0D3DJ66*	Uncharacterized Oxidoreductase Chloroplastic GN=106311918	287.13	1.5705	23	7	7
	DECREASED - ASTRUS RI:RC
Accession	Protein description and GO information	Score	Fold change	Coverage (%)	Pep	Uniq
	METABOLISM
	Metabolic process
A0A0D3BJ90	26S proteasome non-ATPase regulatory subunit 4 homolog GN=106335639	130.35	1.6508	11	2	2
A0A0D3A148	6-phosphogluconate decarboxylating chloroplastic GN=N/A	44.76	2.27721	12	1	1
A0A0D3BB71	Acetyltransferase component of pyruvate dehydrogenase complex GN=N/A, EC 2.3.1.12	201.8	1.52335	13	5	5
A0A0D3AX14	Beta-D-xylosidase 1 GN=BXL1, EC 3.2.1.-	34.69	2.77864	10	5	1
A0A0D3EC46	, DL-glycerol-3-phosphatase 2 GN=N/A	56.23	2.90738	2	1	1
A0A0D3CBP7	Endoglucanase GN=N/A, EC 3.2.1.4	92.44	1.55029	4	4	3
A0A0D3C4D6	FAD-dependent urate hydroxylase GN=106342207	284.65	2.1257	14	5	5
A0A0D3B2U9	malate dehydrogenase [NADP] chloroplastic-like GN=106335373, EC 1.1.1.82	183.75	1.61881	27	12	2
A0A0D3CLB4	Phosphoglucan phosphatase chloroplastic GN=106292619	48.17	1.85455	3	1	1
A0A0D3E753*	Uncharacterized protein GN=106318243	20.16	3.49677	2	1	1
A0A0D3BRD3*	S-adenosylmethionine synthase GN=106342167, EC 2.5.1.6	50.61	1.57387	22	6	1
A0A0D2ZPE9*	Glyceraldehyde-3-phosphate dehydrogenase, GN=106308443/106319595*, EC 1.2.1.-	1218.48	1.52331	54	44	17
A0A0D3C9I2*	Glyceraldehyde-3-phosphate dehydrogenase GN=106295615, EC 1.2.1.-	4167.56	1.70354	60	59	32
	Biosynthetic process
A0A0D3CU91*	STRICTOSIDINE SYNTHASE-LIKE 9-like GN=106300854	133.63	1.55727	10	3	3
A0A0D3E225*	Glutamate-1-semialdehyde 2,1- chloroplastic GN=106318931	228.21	1.88015	11	3	3
A0A0D3A124	Phospho-2-dehydro-3-deoxyheptonate aldolase GN=N/A, EC 2.5.1.54	99.36	1.77149	8	4	2
A0A0D3C154	aspartate aminotransferase GN=106337354, EC 2.3.1.15	55.94	1.7386	5	2	2
A0A0D3CGS6	Glycerol-3-phosphate acyltransferase, chloroplastic GN=GPAT, EC 2.3.1.15	98.38	1.85437	8	2	2
A0A0D3DCM7	UMP-CMP kinase GN=UMP/CMPK, EC 2.7.4.14	167.2	1.55213	26	4	4
A0A0D3DET7	UDP-N-acetylglucosamine transferase subunit ALG14 homolog GN=N/A	29.84	2.29707	3	1	1
A0A0D3AI64	Porphobilinogen deaminase, chloroplastic-like GN=106327858	49.99	1.70201	28	9	1
A0A0D3BF93	SAL1 phosphatase GN=106328745	378.11	1.7354	18	7	7
A0A0D3CSK4	Pentatricopeptide repeat-containing protein At4g14850 GN=106296692	25.19	2.19335	1	1	1
A0A0D3CPS1	Formate--tetrahydrofolate ligase GN=106300060	311.46	1.52403	14	8	5
A0A0D3BJQ6	Serine hydroxymethyltransferase GN=106335712	2654.71	1.07162	63	37	5
	Lipid and Fatty Acid
A0A0D3BPL9	Acyl-[acyl-carrier-protein] desaturase GN=106342438, EC 1.14.19.-	64.37	1.55073	3	1	1
	Aminoacid Metabolism
A0A0D3AAX8	Dihydroxy-acid chloroplastic GN=106317268	23.75	2.25642	3	1	1
A0A0D3A3B8	Threonine synthase 1, chloroplastic GN=106304601	556.46	1.84248	28	11	5
A0A0D3E3G6	Threonine synthase chloroplastic-like GN=N/A	96.31	1.72368	14	8	2
A0A0D3DL12	Glutamine synthetase GN=106312454, EC 6.3.1.2	74.09	1.72107	46	30	2
A0A0D3E238	Histidinol dehydrogenase, chloroplastic GN=HDH, EC 1.1.1.23	27.85	1.90846	2	1	1
Q5FAL5	Putative 2-isopropylmalate synthase GN=B21F5.11	44.57	2.25566	4	2	2
	PROTEIN BIOSYNTHESIS, FOLDING, ASSEMBLY, FATE AND DEGRADATION
A0A0D3CSF1	ruBisCO large subunit-binding protein subunit beta, chloroplastic GN=106300192	254.86	1.99734	56	36	2
A0A0D3BTP6	Peptidyl-prolyl cis-trans isomerase CYP19-4 GN=106337210, EC 5.2.1.8	80.4	1.92711	13	3	2
A0A0D3ECI2	Peptidyl-prolyl cis-trans isomerase CYP20-1 GN=106318852, EC 5.2.1.8	42.89	1.78711	5	1	1
A0A0D3BJ97	Peptidyl-prolyl cis-trans isomerase, PPIase, EC 5.2.1.8	578.79	1.60485	56	7	3
	Ubiquitination process
A0A0D3BAZ0	Mediator of RNA polymerase II transcription subunit 37C GN=106335088	535.35	1.59229	38	24	1
A0A0D3ARJ5	Ubiquitin-conjugating enzyme E2 36 GN=106327600	113.5	1.73827	22	2	2
A0A0D3ECQ3	Ubiquitin-conjugating enzyme E2 7 GN=106313793	37.19	1.99989	6	1	1
A0A0D3BLH4	E3 ubiquitin ligase SUD1 isoform X2 GN=N/A	23.93	2.43181	1	1	1
	Translation, pos-translational and Transduction process
A0A0D3CJZ8	26S proteasome non-ATPase regulatory subunit 5 GN=N/A	156.73	2.26218	4	3	3
A0A0D3B232	40S ribosomal S8-1 GN=106328694	41.25	1.61277	23	4	1
A0A0D3CWB1	5-formyltetrahydrofolate cyclo-ligase COG0212 GN=106296821	135.59	1.79438	10	3	3
A0A0D3A6U1	60S ribosomal L14-2 GN=106292181	53.14	1.74999	7	1	1
A0A0D3D9N2	60S ribosomal L3-1 GN=106319026	126.64	1.76571	9	4	4
A0A0D3BJ21	Elongation factor 1-delta 1 GN=106331419	57.88	1.70003	20	5	2
A0A0D3DWA3*	Cold shock domain-containing 4-like GN=N/A	90.23	2.46746	8	1	1
A0A0D3BD13	Glutamyl-tRNA, Gln amidotransferase subunit B, chloroplastic/mitochondrial, Glu-AdT subunit B GN=GATB, EC 6.3.5.-	142.23	1.78734	10	3	3
A0A0D3AEE9	Lysine--tRNA ligase GN=106336618, EC 6.1.1.6, Lysyl-tRNA synthetase	160.82	2.12522	7	4	4
A0A0D3B7N9	Serine threonine- kinase HT1 GN=106327935	37.06	1.63814	2	1	1
	PHOTOSYNTHESIS, PHOTORESPIRATION AND CHLOROPLASTIC PROCESS
A0A0D3CZK2	Carbonic anhydrase GN=N/A, EC 4.2.1.1, Carbonate dehydratase	22.29	3.01833	10	2	1
B1Q3A8	Cysteine protease GN=BrCP3	310	1.51065	16	5	1
A0A0D3EEB1	Divinyl chlorophyllide a 8-vinyl- chloroplastic GN=106318279	48.91	1.95585	3	1	1
A0A0D2ZQG6*	Ribulose-1,5-bisphosphate carboxylase oxygenase large, chloroplast GN=N/A	86.26	1.54544	69	80	3
A0A0D3C5V4*	Phosphoenolpyruvate carboxylase 2 GN=106341866	308.83	2.15595	6	4	3
A0A0D3DEV3	Mg-protoporphyrin IX chelatase GN=106306835, EC 6.6.1.1	586.13	1.53059	37	11	11
A0A0D3A6Y4	Protochlorophyllide reductase chloroplastic GN=N/A	168.35	1.7045	34	8	3
A0A0D3C7D0	NADPH-protochlorophyllide oxidoreductase GN=N/A	33.96	1.54895	37	14	1
A0A0D2ZQG6	Ribulose-1,5-bisphosphate carboxylase oxygenase large partial, chloroplast GN=N/A	48.2	1.6482	63	65	1
A0A0D3C9T1	Tetratricopeptide repeat 1 GN=N/A	48.88	2.51171	2	1	1
A0A0D3CAZ7	Translation initiation factor IF- chloroplastic GN=106294757	114.21	1.97264	3	3	3
A0A0D3CJR9	Uncharacterized protein GN=106296115	44.38	1.86744	4	1	1
A0A0D3B7Z5	Chlorophyll a-b binding protein CP26, chloroplastic GN=106328597	64.68	3.64109	32	8	1
A0A0D3CLT0	Chlorophyll a-b binding protein CP29.2, chloroplastic GN=106294502	141.84	1.69496	15	3	3
A0A0D3B8L3	Cytochrome b6-f complex iron-sulfur chloroplastic GN=N/A	150.62	1.75075	24	5	2
A0A191SEV6*	Photosystem II 44 kDa, chloroplast GN=psbC	382.29	1.93196	13	5	1
A0A0D3BBE1	Multiple organellar RNA editing factor chloroplastic mitochondrial-like GN=106336338	96.95	1.62431	6	2	2
A0A0D3DI26	Oxygen-Evolving Enhancer Chloroplastic GN=106301616/106311919	82.62	1.73487	24	6	3
A0A0H3Y354	Photosystem I iron-sulfur center GN= psaC, EC 1.97.1.12	467.53	1.5287	84	7	7
A0A0D3CFB6	Photosystem II CP43 reaction center protein GN=N/A	215.37	2.22216	8	3	2
A0A0D3B879	PGR5-like protein 1B, chloroplastic GN=106335540	160.99	1.80803	18	4	3
K4FZS3	Ribulose bisphosphate carboxylase large chain GN=rbcL, EC 4.1.1.39	53.54	1.67124	68	88	2
	DESEASE/DEFENSE RESPONSE
A0A0D3DYQ4	1-aminocyclopropane-1-carboxylate oxidase homolog 3-like GN=N/A	150.84	1.56917	19	3	3
A0A0D3AT05	Glutathione peroxidase mitochondrial GN=106321579	164.86	1.5632	23	4	4
A0A0D3DQE3	Glutathione S-transferase mitochondrial-like GN=106309564	223.19	1.53611	25	5	5
A0A0D3BE15	L-ascorbate peroxidase peroxisomal-like GN=106328411	151.26	1.60792	18	3	3
A0A0D3APR4	MLP-like protein 31 GN=106326827	38.43	2.09949	4	1	1
A0A0D3E2V6	Peroxidase 32 GN=106312869, EC 1.11.1.7	29.43	1.63343	3	1	1
A0A0D3A546	Plastid lipid-associated protein 2, chloroplastic GN=106292489	67.25	1.79242	9	3	1
A0A0D3CPI3	Polyadenylate-binding protein, PABP GN=106300511	135.53	1.71341	5	2	2
A0A0D3DLP4	Selenium-binding 2 GN=106312718	98.94	2.52053	11	4	2
	Oxidative stress
A0A0D3BEN2	2-oxoglutarate mitochondrial GN=106334854	82.38	2.2017	2	2	2
A0A0D3BJE9	Glycine-rich RNA-binding 10 isoform X1 GN=106335131	102.02	2.02699	30	4	1
A0A0D3C7R9*	Peroxidase 3-like GN=106292601	46.36	1.7764	7	1	1
	Pathogen related
A0A0D3E3R7	Hsp70-Hsp90 organizing 2 GN=106319102	46.42	1.64742	3	2	2
	ASSIMILATION PROCESS
A0A0D3E2Y9	Ferredoxin--nitrite chloroplastic-like GN=106318938	942.1	1.5784	32	18	7
	TRANSPORT
A0A0D3CY16	Protein HHL1, chloroplastic-like isoform X2 GN=106300629	63.19	2.03992	22	3	1
A0A0D3DVY9*	Ion channel POLLUX-like 2 isoform X1 GN=106312554	142.4	1.62549	4	3	3
A0A0D3DHM0*	V-type proton ATPase subunit H-like GN=106306225	47.7	2.14343	2	1	1
A0A0H3Y2E8	ATP synthase subunit b, chloroplastic GN=atpF	333.55	1.84832	29	4	4
	SIGNALING PATHWAY and TRANSMEMBRANE RECEPTOR
A0A0D3B4A1	PTI1-like tyrosine- kinase 2 isoform X1 GN=106327924	167.11	1.48619	12	4	4
A0A0D3BBD1*	Leucine-rich repeat receptor-like serine threonine- kinase At3g14840	20.39	1.71445	1	1	1
	DNA and RNA BINDING/ASSEMBLY
A0A0D3CVM1	D-glycerate 3- chloroplastic-like GN=106300109	337.32	1.58396	24	8	3
A0A0D3DVU9	Polyadenylate-binding protein, PABP GN=106312333	34.4	1.79927	5	3	2
A0A0D3CJR1	MAR-binding filament 1 GN=N/A	155.71	1.75659	3	3	3
A0A0D3B9F1	14-3-3 GF14 protein nu GN=106336139	54.03	1.91739	29	9	1
A0A0D3E141	Histone H2A GN=106317918	68.19	1.94235	18	3	2
	ORGANIZATION, HOMEOSTASIS, MODIFICATION AND REPAIR
A0A0D3A3P4	Glutaredoxin-C5, chloroplastic-like GN=106314950	108.8	1.6002	23	3	2
A0A0D3CMF0	Peroxiredoxin 2F- mitochondrial GN=N/A	228.46	1.53462	29	4	4
A0A0D3C505	Hexosyltransferase GN=106342603, EC 2.4.1.-	22.03	1.84447	2	1	1
A0A0D3CHW5	DNA-damage-repair toleration DRT100-like GN=106295795	401.01	1.59094	32	8	8
A0A0D3C853	Histone H1.1 -like GN=106292483	62.59	1.60556	4	1	1
A0A0D3C4S4	SLOW GREEN chloroplastic-like GN=106342420	53.22	1.84937	4	1	1
A0A0D3AK05*	Tubulin alpha-3 chain-like GN=N/A	295.15	1.51164	18	5	3
A0A0D3CPM5*	Tubulin alpha-3 chain GN=N/A	93.52	1.81317	11	3	1
A0A0D3BKN7*	Tubulin beta-9 chain GN=106328101	256.31	1.53072	18	6	2
A0A0D3C4S5*	Kinesin KIN-5B GN=N/A	20.12	1.8693	1	1	1
A0A0D3CAI6*	ATP-dependent DNA helicase GN=N/A, EC 3.6.4.12	25.67	2.14467	1	1	1
	DEVELOPMENT GROWTH AND REPRODUCTOTION PROCESS
A0A0D3EEY7	Uncharacterized protein GN=N/A
A0A0D3CMS5	Uncharacterized protein GN=106293793
	NO INFORMATION
A0A0D3CRD0	BnaC06g09650D GN=N/A	24.29	18.4968	6	1	1
A0A0D3C2E9	Copper ion binding GN=106336957	68.4	1.50892	25	2	2
A0A0D3ARW7*	COBW domain-containing 1 GN=106327903	86.32	1.6506	7	3	3
A0A0D3ACS5*	F-box At3g17710-like GN=106338601	27.71	2.11425	2	1	1
A0A0D3E2S9*	kDa proline-rich -like GN=106319339	383.92	1.56153	17	4	4
A0A0D3CW61*	Long chain acyl- synthetase chloroplastic GN=106300544	35.27	4.31283	3	2	2
A0A0D3B898*	Monocopper oxidase SKU5 GN=106336415	50.55	1.5013	2	1	1
A0A0D2ZQ33	Uncharacterized protein GN=N/A	50.55	1.50287	6	1	1
A0A0D3DQ98	Uncharacterized protein GN=106310314	22.64	2.22724	1	1	1
A0A0D3C143	Uncharacterized protein LOC106339685 GN=106339685	135.49	1.63137	17	3	3
A0A0D3B205	Uncharacterized protein LOC106329338 GN=106329338	57.61	1.61492	7	1	1
A0A0D3D061	Uncharacterized protein LOC106298385 GN=106298385	95.92	1.85983	7	1	1
*Protein identified in chloroplast enriched samples
GN: gene name according to Uniprot database; the symbol (/) indicates two accession numbers for the same protein
GO: Gene Ontology

## Sheet: BioProcess (GO)_Veloce SI-SC
	INCREASED - VELOCE (SI:SC)
Accession	Protein description and GO information	Score	Max fold change	Coverage (%)	#Peptides	#Unique
	METABOLISM
	Metabolic Process
A0A0D3BUR4	26S proteasome regulatory subunit S10B homolog B GN= 106336665	61.09	1.72296	6	2	1
A0A0D3APN7	Anthranilate partial GN= 106327621	81.2	1.79203	6	3	3
A0A0D2ZZ40	Carboxylesterase 13 GN= CXE13	39.07	1.68358	9	1	1
A0A0D3BL76*	Catalase GN= 106335797 (EC 1.11.1.6)	797.23	1.69444	69	24	2
A0A0D3D7T0*	Catalase GN= N/A (EC 1.11.1.6)	2422	1.46987	4	30	1
A0A0D3AZR8*	Chlorophyll(ide) b reductase NOL, chloroplastic GN= 106332965	22.04	1.72668	13	1	1
A0A0D3C8I5	Cysteine desulfurase chloroplastic GN= NFS2 (EC 2.8.1.7)	30.71	2.0667	2	1	1
A0A0D3DUU3*	Cysteine synthase GN= N/A (EC 2.5.1.47)	135.6	1.64217	20	3	3
A0A0D3BFR4*	Delta-1-pyrroline-5-carboxylate dehydrogenase 12A1, mitochondrial GN= 106335352	182.23	2.75127	17	3	3
A0A0D3CTI0*	Fructose-bisphosphate aldolase GN= 106300510 (EC 4.1.2.13)	154.02	1.75651	1	3	2
A0A0D3EFG5*	Formate dehydrogenase, mitochondrial (FDH) GN= 106319166 (EC 1.17.1.9) (NAD-dependent formate dehydrogenase)	88.89	1.63904	3	1	1
A0A0D3D8S6*	Glutathionyl-hydroquinone reductase YqjG GN= 106306032	103.17	2.12343	27	1	1
A0A0D3A2C6*	Glycine cleavage system P protein GN= 106303581 (EC 1.4.4.2)	2186.63	1.48521	9	29	29
A0A0D3CQE1*	Malate dehydrogenase GN= 106296346 (EC 1.1.1.37)	602.76	1.7844	25	7	1
A0A0D3CQN2*	Malate dehydrogenase GN= 106301033 (EC 1.1.1.37)	131.58	2.14801	28	7	1
A0A0D3B954*	Malic enzyme GN= 106328013	76.6	3.30235	45	1	1
Q56H03*	Myrosinase GN= N/A	44.92	2.25232	7	4	1
A0A0D2ZRT1*	Nitrilase 2-like GN= 106320293	81.61	2.60034	16	5	2
A0A0D3CGY3*	Uncharacterized protein GN= N/A	817.68	1.48789	41	12	11
A0A0D3DSW6	Uracil chloroplastic-like GN= 106308074	63.9	1.58018	8	2	2
A0A0D3D234*	Uncharacterized protein GN= N/A	76.26	2.14096	3	1	1
A0A0D3CYL6*	Uncharacterized protein GN= 106301107	370.25	1.48945	33	7	6
A0A0D3EC68*	Xylose isomerase (EC 5.3.1.5) GN= 106318390	224.37	1.67034	3	4	4
	Glicolytic/glucolysis and gluconeogenesis
A0A0D3A0U9	Fructose-bisphosphate aldolase GN= N/A (EC:4.1.2.13)	75.11	1.75795	58	34	2
A0A0D3DIE9		2.16061	1.70724	58	34	2
A0A0D3E3Z1	Succinate--CoA ligase [ADP-forming] subunit beta, mitochondrial GN= N/A (EC 6.2.1.5)	27.21	1.65735	20	7	1
A0A0D3C0Y4	Triosephosphate chloroplastic GM= TIM (EC 5.3.1.1)	112.99	2.02239	50	18	3
A0A0D3A6M9*	Fructose-bisphosphate aldolase GN= N/A (EC 4.1.2.13)	398.75	1.64046	42	7	6
A0A0D3DIE9*	Fructose-bisphosphate aldolase GN= 106306452 (EC 4.1.2.13)	216.69	2.16061	30	25	1
	Lipid and Fatty Acid
A0A0D3BBA2	Peroxisomal (S)-2-hydroxy-acid oxidase GLO2 isoform X1 GN= N/A	237.73	1.5339	64	23	2
A0A0D3A257*	Fatty acyl-CoA reductase GN= 106304774 (EC 1.2.1.84)	185.68	1.53293	5	5	5
A0A0D3BGF3*	Uncharacterized protein LOC106328619 isoform X1 GN= 106328619	233.56	1.76354	9	3	3
	Biosynthetic Process
A0A0D3DFY1*	Argininosuccinate synthase, chloroplastic-like GN= 106301519	25.95	1.50057	30	1	1
A0A0D3E253	Bifunctional riboflavin biosynthesis RIBA chloroplastic GN= RIBA1	62.12	1.61907	4	2	2
A0A0D3CJ64*	Glutamine synthetase GN= 106295911 (EC 6.3.1.2)	30.12	2.10931	22	1	1
O47881*	L-galactono-1,4-lactone dehydrogenase, mitochondrial GN= N/A (EC 1.3.2.3)	102.59	1.93097	14	4	4
A0A0D3CVH2*	Lipoxygenase GN= 106300136 (EC 1.13.11.-)	221.72	2.76894	4	5	5
A0A0D3CU75*	Magnesium-protoporphyrin IX monomethyl ester [oxidative] cyclase, chloroplastic GN= 106299791	52.75	1.50798	11	1	1
A0A0D3C7D0*	NADPH-protochlorophyllide oxidoreductase GN= N/A (EC 1.3.1.33)	173.98	2.36447	9	6	1
A0A0D3AT44*	Nucleoside diphosphate kinase GN= 106321604 (EC 2.7.4.6)	169.13	2.18182	7	4	4
A0A0D3BNB0*	Nucleoside diphosphate kinase GN= 106329117 (EC 2.7.4.6)	237.99	1.70581	13	3	3
A0A0D3A152*	Serine hydroxymethyltransferase GN= 106314004 (EC 2.1.2.1)	3327.63	1.52191	2	40	1
A0A0D3BJQ6*	Serine hydroxymethyltransferase GN= 106335712 (EC 2.1.2.1)	150.08	2.2254	2	42	4
A0A0D3B530	Sucrose-phosphatase 2 GN= SPP2 (EC 3.1.3.24)	77.85	1.59596	6	3	3
A0A0D3E2U4*	Serine--glyoxylate aminotransferase GN= 106318812	314.54	1.64004	12	9	4
A0A0D3CYU7*	Uncharacterized protein GN= 106296704	1016.64	1.83135	21	13	5
	Aminoacid Metabolism
A0A0D3DUU3	Cysteine synthase GN= N/A (EC 2.5.1.47)	1.64217	1.68198	18	6	6
A0A0D3A280	Phospho-2-dehydro-3-deoxyheptonate aldolase chloroplastic GN= DHS1 (EC 2.5.1.54)	295.58	1.5329	15	7	5
A0A0D3BD95	Peptidyl-prolyl cis-trans isomerase GN= N/A (EC 5.2.1.8)	117.24	1.71974	8	4	4
A0A0D3DWN7	2-isopropylmalate synthase chloroplastic GN= IPMS2 (EC 2.3.3.13)	25.8	1.5381	5	2	1
A0A0D3BR82	Diaminopimelate chloroplastic GN= 106339351	72.31	1.82171	8	2	2
HISX_BRAOC	Histidinol dehydrogenase, chloroplastic GN= HDH (EC 1.1.1.23)	20.23	1.51789	2	1	1
A0A0D3BZU4	Imidazole glycerol phosphate synthase chloroplastic GN= HISN4	38.83	1.51836	4	2	2
A0A0D3DRN5	Branched-chain-amino-acid aminotransferase GN= N/A (EC 2.6.1.42)	26.02	1.50636	2	1	1
	PROTEIN BIOSYNTHESIS, FOLDING, ASSEMBLY, FATE AND DEGRADATION
A0A0D3CVM1	D-glycerate 3- chloroplastic-like GN= GLYK	206.05	1.63808	27	9	2
A0A0D3DAR1	Heat shock protein 83-like GN= HSP83-1	1.59527	1.65126	26	15	1
A0A0D3DEC3	Importin subunit alpha-2-like GN= N/A	109.46	1.55193	8	3	1
A0A0D3DAG4*	NADH-quinone oxidoreductase subunit D GN= N/A	212.33	1.51958	8	5	5
A0A0D3BTP6	Peptidyl-prolyl cis-trans isomerase (PPIase) GN= CYP ROT1 (EC 5.2.1.8)	74.57	1.67173	17	4	2
A0A0D3C510		20.52	1.58814	6	1	1
A0A0D3BWC2		91.33	1.60285	41	8	3
A0A0D3DBA0	Proteasome subunit beta type GN= 106305944 (EC 3.4.25.1)	74.66	1.75807	8	2	2
A0A0D3E636	Proteasome subunit alpha type GN= 106312910 (EC 3.4.25.1)	116.45	1.5191	19	4	4
A0A0D3CTQ3*	Universal stress protein YxiE-like GN= 106296807	98.16	2.0934	8	1	1
A0A0D3A759	SUMO-conjugating enzyme UBC9-like GN= UBC9 (EC 2.3.2.-)	72.27	1.7925	7	2	2
	Transcription, Translation, pos-translational and Transduction process
A0A0D3DXU7*	40S ribosomal protein S4-1-like GN= 106310546	90.36	1.91536	0	2	2
A0A0D3DXD6	60S ribosomal L10-1 GN= 106309948	37.72	1.95038	5	1	1
A0A0H3XZT6	50S ribosomal protein L14, chloroplastic GN= rpl14	148.04	1.65674	30	3	3
A0A0D2ZQ45*	50S ribosomal protein L29, chloroplastic-like GN= 106319788	73.27	1.70439	16	2	2
A0A0D3C896*	50S ribosomal protein L4, chloroplastic GN= 106294834	46.85	4.01883	16	1	1
A0A0D3BUD3*	60S acidic ribosomal protein P2-2-like GN= 106339404	67.89	2.32997	13	1	1
A0A0D3CMJ8*	60S ribosomal protein L22-2 GN= 106292862	212.19	1.48916	6	4	4
A0A0D3D2K0*	60S ribosomal protein L28-1-like GN= 106303665	41.46	3.07768	5	2	1
A0A0D3A3G8*	60S ribosomal protein L28-2 GN= 106342685	124.91	2.6842	30	2	1
A0A0D3ACH8	60S ribosomal L30-1 GN= N/A	148.37	2.0168	29	3	3
A0A0D3CWB1	5-formyltetrahydrofolate cyclo-ligase GN= COG0212	65.3	1.51474	6	2	2
A0A0D3BW18	Carotenoid 9,10(9 ,10 )-cleavage dioxygenase 1 GN= N/A	517.6	1.51221	18	12	12
A0A0D3CLW2	Elongation factor P (EF-P) family GN= N/A	150.63	1.58219	25	5	5
A0A067ZYQ0	Elongation factor 1-alpha 1 GN= EF1a	23.15	1.58545	34	4	1
A0A0D3C5D1	Eukaryotic translation initiation factor 2 subunit alpha-like GN= 106336807	38.01	1.8223	4	1	1
A0A0D3AC15*	Histone H2A GN= 106318253	36.07	2.03868	38	13	1
A0A0D3CRA2*	Histone H2A GN= N/A	45.97	5.70892	28	5	3
A0A0D3A6Q3*	Lutamate--tRNA ligase, cytoplasmic-like GN= 106300111	52.8	1.71698	11	1	1
A0A0D3AEE9	Lysine--tRNA ligase GN= 106336618 (EC 6.1.1.6)	167.07	1.89047	9	6	6
A0A0D3BW68	Peptide chain release factor chloroplastic-like GN= APG3	88.51	1.57695	9	3	3
A0A0D3BUE3*	Ribosomal protein GN= 106336932	65.39	1.71676	11	1	1
A0A0D3DBU6*	Uncharacterized protein GN= N/A	231.51	1.82713	10	5	5
	PHOTORESPIRATION, CHLOROPLASTIC AND PHOTOSYNTHESIS PROCESS
A0A0D3D991*	ATP-dependent Clp protease proteolytic subunit GN= 106307110	100.44	2.02951	5	1	1
A0A0D3CND4*	Carbonic anhydrase GN= 106295174 (EC 4.2.1.1) (Carbonate dehydratase)	2595.48	1.85538	29	25	12
A0A0D3C4J2	Cell division protein FtsZ homolog 2-1, chloroplastic isoform X2 GN= 106342750	83.8	1.50158	17	6	1
A0A0H3XYM2	Cytochrome f GN= petA	754.72	1.66556	48	16	16
A0A0D3C008	Ferredoxin-thioredoxin reductase, catalytic chain GN= N/A (EC:1.8.7.2)	68.8	1.6894	17	2	2
A0A0D3CVI5	Glyoxylate hydroxypyruvate reductase A HPR2 GN= HPR 2 (EC 1.1.1.79) (EC 1.1.1.81)	73.15	1.83714	7	2	2
A0A0D3A658	Magnesium-protoporphyrin IX methyltransferase GN= CHLM (EC 2.1.1.11)	117.12	1.58462	19	4	4
A0A0D3CSR1	Peptide chain release factor PrfB1, chloroplastic isoform X1 GN= PRFB1	24.51	1.88629	2	1	1
A0A0D2ZS19*	Plastid-lipid-associated protein 9, chloroplastic GN= 106320364	73.91	1.76788	18	4	4
A0A0D3AI64	Porphobilinogen deaminase, chloroplastic-like GN= N/A	35.13	1.60501	28	9	1
A0A0D3DA03	Probable inactive leucine-rich repeat receptor-like protein kinase GN= At1g66830	27.13	2.28489	1	1	1
A0A0D3A6Y3	Protochlorophyllide reductase B chloroplastic GN= PORB (EC 1.3.1.33)	308.93	1.51463	38	8	2
A0A0D2ZQG6	Ribulose-1,5-bisphosphate carboxylase oxygenase large subunit (chloroplast) GN= N/A	36.67	3.37104	59	63	1
A0A0D3AZG3	SLOW GREEN chloroplastic GN= SG1	34.04	1.86094	4	1	1
A0A0D3A6Z6*	Stomatin-like protein 2, mitochondrial GN= 106295584	155.45	1.74046	3	1	1
A0A0D3E2E7	Thioredoxin-like protein AAED1, chloroplasticGN= AhpC	72.63	1.6943	9	2	2
A0A0D3A8W2*	TIC 62, chloroplastic GN= 106310518	1326.78	1.50786	7	15	15
A0A0D3BJF9*	Uncharacterized protein GN= N/A	655.92	1.79291	9	11	11
A0A0D3BTD3*	BnaC04g13750D protein GN= N/A	79.13	6.0115	38	12	1
A0A0D3AHD4	Chlorophyll a-b binding protein CP29.1, chloroplastic GN= N/A	68.99	2.11909	10	2	2
A0A0D3CLT0*	Chlorophyll a-b binding protein, chloroplastic GN= 106326932/106342793	307.51	1.56262	5	7	7
A0A0D3BQC7*		174.16	1.62903	6	4	4
A0A0D3DI26*	Oxygen-evolving enhancer protein 1, chloroplastic-like GN= 106301616	102.58	1.6361	15	10	4
A0A0D3DYQ1*	Oxygen-evolving enhancer protein 2, chloroplastic isofor X1 GN= 106312114	431.57	2.98468	13	27	8
A0A0D3DJ65*	Oxygen-evolving enhancer protein 2, chloroplastic GN= 106311919	2904.79	2.72733	65	26	7
A0A0D3BQK6	Photosynthetic NDH subunit of lumenal location 1, chloroplastic GN= PNSL1	85.72	2.32661	16	3	3
A0A0H3Y354	Photosystem I iron-sulfur center GN= psaC (EC 1.97.1.12)	142.59	1.92258	53	4	4
A0A191SEV6	Photosystem II CP43 reaction center protein GN= psbC	149.53	2.82051	12	4	1
A0A191SEU8	Photosystem II D2 protein GN= psbD (EC 1.10.3.9)	116.77	1.61448	12	3	2
A0A0D3D1B1*	psbP domain-containing protein 4, chloroplastic GN= 106298415	26.71	8.58462	3	1	1
A0A0D3B7J6*	Thylakoid lumenal 19 kDa protein, chloroplastic GN= 106336110	385.45	3.22098	11	5	5
A0A0D3B8L3*	Uncharacterized protein (Fragment) GN= N/A	271.83	1.65707	33	19	4
A0A0D3E811*	Uncharacterized protein GN= N/A	254.1	3.07235	23	3	3
	DISEASE/DEFENSE RESPONSE
A0A0D3BZV5	AIG2-like protein GN= AIG2L (EC 2.3.2.-)	90.2	1.91412	16	2	2
A0A0D3A222	Aldehyde dehydrogenase family 3 member chloroplastic isoform X2 GN= LOC106315472	24.21	1.50444	2	1	1
A0A0D3D1T5*	Metacaspase-4 GN= 106300010	52.13	1.68167	4	1	1
A0A0D3BJ77	Protein DETOXIFICATION GN= A0A0D3BJ77	37.15	1.64736	1	1	1
D1MWF5	Pheophorbide a oxygenase GN= BoPAO	23.5	2.72839	3	1	1
A0A0D3B8J8*	Plastid lipid-associated protein 1, chloroplastic GN= 106328517/GN=N/A/GN=A	464.27	2.48331	43	9	3
A0A0D3E8B7*		341.87	2.71114	62	5	3
A0A0D3BRT9*	Plastid lipid-associated protein 3, chloroplastic GN= 106342579	789.57	1.80417	6	13	13
A0A0D3CPI3	Polyadenylate-binding protein GN= PABP	63.77	1.58817	5	2	2
A0A0D3CLB6	Superoxide dismutase GN= 106292572 (EC 1.15.1.1)	40.7	2.34191	12	3	1
A0A0D3C8L3*	Superoxide dismutase [Cu-Zn] GN= 106344020 (EC 1.15.1.1)	136.62	1.59953	5	2	2
A0A0D3EB42	Thiamine thiazole synthase, chloroplastic (Thiazole biosynthetic enzyme) GN= THI1	259.82	1.83207	27	8	8
A0A0D3A4K8*	Uncharacterized protein GN= N/A	156.38	1.64917	2	4	2
A0A0D3BHB8*	Uncharacterized protein GN= N/A	20.49	2.36325	21	1	1
A0A0D3EID2*	Uncharacterized protein At5g02240 GN= 106318266	116.83	2.70995	21	1	1
	Oxidative stress
A0A0D3E2V2*	Methylmalonate-semialdehyde dehydrogenase [acylating], mitochondrial GN= 106319113	38.37	1.82153	34	1	1
A0A0D3A664	Peptide methionine sulfoxide reductase GN= MSR	249.35	1.51901	30	6	6
A0A0D3C4Z2	Peroxidase GN= 106339707 (EC 1.11.1.7)	34.53	1.72409	4	1	1
A0A0D3B8D6*	Thylakoid lumenal 29 kDa protein, chloroplastic GN= 106328985	1325.03	1.75344	29	16	16
A0A0D3CDN4*	Uncharacterized protein At1g32220, chloroplastic GN= 106294463	221.97	1.50938	28	4	4
	Pathogen related
A0A0D3CND6*	Peptidyl-prolyl cis-trans isomerase CYP38, chloroplastic GN= 106295148	392.39	2.7425	53	8	8
	TRANSPORT
A0A0D3CGB8*	Annexin GN= 106295437	754.13	2.05888	21	11	11
Q9FUC0*	Aquaporin PIP3 GN= PIP3	148.06	2.05419	35	4	2
Q9FUL1*	Aquaporin PIP1b1 GN= N/A	162.44	2.48621	22	2	1
A0A191SEV9	ATPase beta subunit (chloroplast) GN= ATPB (EC 3.6.3.14)	20.72	3.33083	70	40	1
A0A0D6CBC9*	ATP synthase subunit alpha GN= atp1 BniMp009	1600.61	1.69724	9	29	20
A0A0D3D022	Calcium-dependent kinase 2-like GN= 106300488	87.84	1.93009	25	10	3
A0A0D3BLE3	Coatomer subunit gamma GN= 106334917	57.63	1.5389	4	2	2
A0A0D3DKT0*	Glycine cleavage system H protein GN= 106307779	441.83	1.80525	21	6	1
A0A0D3BAL7	Mitochondrial dicarboxylate tricarboxylate transporter DTC GN= N/A	129.9	1.72411	6	4	4
A0A0D3A1Y0*	NADH dehydrogenase [ubiquinone] 1 beta subcomplex subunit 9-like isoform X2 GN= N/A	46.64	1.83325	64	1	1
A0A0D3DSD6*	Non-specific lipid-transfer protein GN= 106308000	38.18	1.55476	13	1	1
A0A0D3BP97*	Outer envelope pore protein 16-3, chloroplastic/mitochondrial GN= 106342511	81.53	2.57735	24	1	1
A0A0D3AK03	Ribosomal L14 (chloroplast) GN= 106326954	460.25	1.52401	48	10	10
A0A0D3C730	Translocase of chloroplast chloroplastic GN= 106343505 (EC 3.6.5.-)	89.86	1.5806	11	3	3
A0A0D3C2Z6	Transport SEC13 homolog B-like GN= 106337104	37.64	1.58123	5	1	1
A0A0D3B3S7*	Uncharacterized protein (Fragment) GN= N/A	160.56	1.80128	1	3	3
A0A0D3C9J5*	V-type proton ATPase subunit GN= 106295861	274.2	2.87761	10	6	1
A0A0D3DU49*	V-type proton ATPase subunit C GN= 106312517	185.1	2.66188	7	6	1
A0A0D3DPE1*	V-type proton ATPase subunit C GN= 106312480	512.91	2.77768	55	6	1
A0A0D3E956*	V-type proton ATPase subunit E1 GN= 106315474	429.99	1.50135	41	8	3
A0A0D3DHM0*	V-type proton ATPase subunit H GN= 106306225	232.62	1.66889	5	5	5
	SIGNALING PATHWAY and TRANSMEMBRANE RECEPTOR
A0A0D3CGF5	14-3-3-like protein GF14 phi GN= GRF4	23.32	1.82028	23	8	1
A0A0D3AIF5*	14-3-3-like protein GF14 lambda GN= 106326938	219.36	1.77507	4	5	3
A0A0D3CQL2	Lectin At1g53070 GN= 106296731	94.2	1.66026	10	3	3
A0A0D3D099*	Leucine-Rich Repeat Receptor Kinase Pepr1 GN=N/A	119.56	1.72917	12	2	2
	DNA and RNA BINDING/ASSEMBLY
A0A0D3BRS7*	Uncharacterized protein GN= N/A	23.18	1.64359	22	8	1
	CELL MOVIMENT and DIVISION
A0A0D3AKV1	Actin-depolymerizing factor 3-like GN= 106324726	236.33	2.19032	43	5	1
A0A0D3B2I8	Actin-depolymerizing factor 3-like GN= 106328861	24.52	2.06725	43	5	1
A0A0D3B0H8*	Kinesin-like protein KCA1 isoform X2 GN= 106334999	72	1.78246	2	1	1
A0A0D3CTC6	Myosin heavy chain, non-muscle GN= 106299780	28.7	1.81894	1	1	1
A0A0D3C8T7*	Ras-related protein RABA2a GN= 106343592	54.85	2.08712	16	2	1
A0A0D3CTE9*	Dynamin-related protein 1A GN= N/A	62.11	1.80927	28	1	1
	ORGANIZATION, HOMEOSTASIS, MODIFICATION AND REPAIR
A0A0D3AYC6	21 kDa protein-like GN= N/A	54.2	1.86961	6	2	2
A0A0D3B3D4	65-kDa microtubule-associated 1 GN= 106328072	39.65	2.21802	2	1	1
A0A0D3DJ59	ATP-dependent zinc metalloprotease FTSH chloroplastic GN= 106311409	65.54	1.64721	44	24	2
A0A0D3E4M2	Bifunctional dTDP-4-dehydrorhamnose 3,5-epimerase dTDP-4-dehydrorhamnose reductase GN= 106312864	80.73	2.01365	8	2	2
A0A0D3CXY1*	Gycerate dehydrogenase HPR, peroxisomal-like GN= 106296704	169.11	1.97574	8	12	4
A0A0D3E5T6	Haloacid dehalogenase-like hydrolase family GN= 106318447	142.78	1.67167	4	5	5
A0A0D3A461*	Leucine-rich repeat extensin-like protein 5 isoform X1 GN= 106307049	57.55	1.77794	20	1	1
A0A0D3B6U2*	Pectinesterase GN= 106329510 (EC 3.1.1.11)	192.02	2.42705	22	3	3
A0A0D3A3R8	Prohibitin-1- mitochondrial GN= PHB1	20.06	2.03605	17	4	1
A0A0D3C7E7	Prohibitin-2 mitochondrial-like GN= PHB2	182.07	1.66084	20	5	2
A0A0D3DB82	Prohibitin-4, mitochondrial GN= PHB4	48.77	1.89385	27	7	2
A0A0D3DBZ4*	Protease Do-like 1, chloroplastic GN= 106307104	666.09	2.23063	13	12	12
A0A0D3CMF0*	Peroxiredoxin-2F, mitochondrial GN= N/A	54.94	1.7648	35	1	1
A0A0D3A3B8	Threonine synthase chloroplastic GN= 106304601	356.92	1.54049	23	10	4
A0A0D3DZ53	Thioredoxin M- chloroplastic GN= 106307865	69.3	1.98983	19	2	1
A0A0D3EF89*	Uncharacterized protein GN= N/A	20.1	1.73101	52	1	1
	NO INFORMATION
A0A0D3BZ09	3-hydroxyisobutyryl- hydrolase mitochondrial GN= 106342662	70.99	1.63373	5	2	2
A0A0D3AYA5	ATP-dependent Clp protease ATP-binding subunit GN= 106322577	77.84	1.58237	10	2	2
B1Q3A2*	Cysteine protease GN= BoCP3	268.72	1.62559	42	5	1
A0A0D3BZ97	DNA-binding SMUBP-2 GN= 106341953	21.59	2.52289	1	1	1
A0A0D3D5Z5*	GDSL esterase/lipase At1g29670-like GN= 106303731	106.3	1.65907	20	5	2
A0A0D3D059	Germin 1 GN= 106296677	228.67	2.13062	18	5	5
A0A0D3BC94	Glutathione S-transferase mitochondrial-like GN= N/A	37.54	1.65478	4	1	1
A0A0D3BYA8*	Histone H2B GN= 106312186	62.73	1.72514	17	10	1
A0A0D3EDA3*	Histone H2B GN= 106313350	121.66	2.19477	19	12	1
A0A0D3D3Q6	Histone -like GN= 106306837	66.07	1.71794	16	3	3
A0A0D2ZRH4	Lactoylglutathione lyase isoform X2 GN= N/A	34.68	1.66751	6	1	1
A0A0D3E0E6*	Light regulated protein-like protein GN= 106313182	90.31	1.79499	13	1	1
A0A0D3CZA0*	Methyltransferase-like protein 7A GN= 106301029	199.02	2.63146	20	2	2
A0A0D3DH75	NAD(P)-binding Rossmann-fold superfamily GN= 106301649	28.42	1.94321	4	1	1
A0A0D3EG41*	NADH dehydrogenase [ubiquinone] iron-sulfur protein 7, mitochondrial GN= 106335690	173.42	1.75795	4	4	4
Q2XSM1*	NADH dehydrogenase subunit 9 GN= NAD9	73.14	1.5404	8	1	1
A0A0D3C630	Peptidylprolyl isomerase GN= 106337573 (EC 5.2.1.8)	101.3	3.07516	5	2	2
A0A0D3CBR0*	Plastocyanin GN= 106296130	281.68	2.65168	20	2	2
A0A0D3DQJ6*	Plastocyanin GN= N/A	316.62	2.96279	20	2	2
A0A0D3CJV9*	Peptidyl-prolyl cis-trans isomerase CYP37, chloroplastic GN= 106343298	481.39	2.83363	5	8	8
A0A0D3CLJ1*	Peptidylprolyl isomerase GN= 106292499 (EC 5.2.1.8)	53.52	2.04048	23	1	1
A0A0D3BWN2*	Peptidylprolyl isomerase GN= 106339589 (EC 5.2.1.8)	50.31	1.55165	8	2	2
A0A0D3B024	Polygalacturonase inhibitor 2-like GN= 106328960	26.95	3.09448	2	1	1
A0A0D3BPN7	PREDICTED: protein LOC106339338 GN= N/A	215.37	1.61554	12	5	5
A0A0D3BP79	PREDICTED: protein LOC106341664 GN= N/A	21.47	2.73015	0	1	1
A0A0D3E769*	Ras-related protein RABD2b-like GN= 106318755	92.22	1.89105	2	3	2
A0A0D3A8N8	Trans-2-enoyl- mitochondrial GN= N/A	138.85	1.76477	14	4	4
A0A0D3DGT1	S-adenosyl-L-methionine-dependent methyltransferases superfamily GN= N/A	24.85	2.67632	3	1	1
A0A0D3A5J3	Short-chain dehydrogenase TIC chloroplastic GN= N/A	35.15	1.60954	3	1	1
A0A0D3DK02*	Succinate dehydrogenase subunit 5, mitochondrial-like isoform X2 GN= 106309508	196.41	1.66524	20	4	4
A0A0D3EHG5	Tropinone reductase homolog At5g06060-like GN= 106318354	38.62	1.7585	11	3	2
A0A0D3BPY9*	Thylakoid lumenal 15 kDa protein 1, chloroplastic isoform X2 GN= 106339774	75.32	2.40971	17	1	1
A0A0D3EAP2*	Thylakoid lumenal 17.4 kDa protein, chloroplastic GN= 106313560	31.98	6.22326	37	1	1
A0A0D3D7E8*	Uncharacterized protein GN= N/A	86.19	2.15171	18	3	1
A0A0D3AIG8*	Uncharacterized protein At1g32220, chloroplastic GN= 106327249	92.72	2.10752	27	2	2
A0A0D3AJA2*	Uncharacterized protein At1g32220, chloroplastic GN= 106325121	88.8	1.72942	11	1	1
A0A0D3ADJ1*	Uncharacterized protein GN= N/A	48.14	1.71604	72	1	1
A0A0D3A713*	Uncharacterized protein LOC106312213 GN= 106312213	88.29	1.6313	4	1	1
A0A0D3AQI7*	Uncharacterized protein GN= N/A	154.54	1.91176	8	2	2
A0A0D3BGJ5*	Uncharacterized protein LOC106329412 GN= 106329412	86.35	1.5385	12	2	2
A0A0D3BHM9*	Uncharacterized protein (Fragment) GN= N/A	54.01	1.75715	1	2	1
A0A0D3BJI3*	Uncharacterized protein GN= N/A	53.85	1.94051	39	1	1
A0A0D3BZ21*	Uncharacterized protein At4g13200, chloroplastic GN= 106341851	62.26	1.69999	49	1	1
A0A0D3E8B6*	Uncharacterized protein GN= N/A	280.7	2.28053	17	9	6
A0A0D3ECB6*	Uncharacterized protein LOC106318549 GN= 106318549	163.54	2.0725	8	2	2
A0A0D2ZSE0*	Uncharacterized protein At5g49945 GN= 106320474	42.53	1.74254	15	1	1
A0A0D3BN26*	Uncharacterized protein GN= N/A	33.37	1.54284	48	3	1
A0A0D3BEB8*	UPF0548 protein At2g17695 GN= 106329145	112.75	1.19293	3	4	4
A0A0D3E035*	Uncharacterized protein GN= N/A	204.06	1.69214	53	3	3
A0A0D3DWY3*	Uncharacterized protein LOC106311718 isoform X1 GN= 106311718	34.97	2.09301	8	1	1
A0A0D3DJ66*	Uncharacterized oxidoreductase At1g06690, chloroplastic GN= 106311918	285.29	1.79514	51	5	5
A0A0D3BX06*	V-type proton ATPase subunit D-like GN= 106337098	250	2.02391	10	5	5
	DECREASED - VELOCE (SI:SC)
Accession	Protein description and GO information	Score	Max fold change	Coverage (%)	#Peptide	#Unique
	METABOLISM
	Metabolic Process
A0A0D3BSK2*	3-ketoacyl-CoA thiolase 2, peroxisomal GN= 106342622	400.77	1.62811	20	7	2
A0A0D3B4N7	3-ketoacyl- thiolase peroxisomal GN= 106336485	172.58	1.71591	47	17	4
A0A0D3BSK2	3-ketoacyl- thiolase peroxisomal GN= 106342622	1032.03	2.06556	55	18	5
A0A0D3CN92	6-phosphogluconate dehydrogenase, decarboxylating 3 GN= 106340355 (EC 1.1.1.44)	18.43	5.5399	33	14	11
A0A0D3CE12	Adenine phosphoribosyltransferase chloroplastic GN= 106295324	130.44	1.58106	31	4	4
A0A0D3CXU7*	Alpha-xylosidase 1-like GN= 106300429	132.54	1.56198	5	4	2
A0A0D3B6J8	Basic endochitinase CHB4-like GN= 106334711	26.22	12.1941	6	1	1
A0A0D3BU47*	Beta-galactosidase GN= 106341709, EC 3.2.1.23	153.2	2.11063	5	3	2
A0A0D3B589*	Bifunctional enolase 2/transcriptional activator-like GN= 106336268	455.68	1.68361	21	7	1
A0A0D2ZTY6*	Calcium sensing chloroplastic GN= N/A	53.07	1.52008	23	5	1
A0A0D3AG72*	Carbonic anhydrase GN= N/A, EC 4.2.1.1 (Carbonate dehydratase)	53.55	2.41352	36	13	3
C9EH44	Catalase GN= N/A (EC 1.11.1.6)	1667.29	1.57245	66	31	1
A0A0D3BSL1	Fructose-1,6- cytosolic GN= N/A	25.89	28.3517	38	7	1
A0A0D3C6Q7	Fumarate hydratase mitochondrial GN= 106336855	69.18	1.70362	5	2	2
A0A0D3BXB6	Glucan endo-1,3-beta-glucosidase-like GN= 106341843	368.37	2.83104	31	8	8
A0A0D3A1T5	Isocitrate dehydrogenase [NAD] regulatory subunit mitochondrial GN= N/A	122.01	1.65951	11	4	2
A0A0D3BMU9	Malate dehydrogenase mitochondrial GN= N/A (EC 1.1.1.37)	38.37	14.4339	60	20	1
A0A0D3DRJ8	Peroxidase 34-like GN= 106310991 (EC 1.11.1.7)	264.47	1.50922	17	6	6
A0A0D3BB01*	Phosphoglycerate kinase GN= 106335787, (EC 2.7.2.3)	420.29	1.56609	66	32	2
A0A0D3BBS5	S-adenosylmethionine synthase 2-like GN= 106335224 (EC 2.5.1.6)	323.04	1.54609	42	12	3
	Glicolytic/glucolysis and gluconeogenesis
A0A0D3C4L8	Bifunctional enolase 2 transcriptional activator GN= N/A	731.36	1.56478	61	17	2
	Biosynthetic Process
A0A0D3CVG9	2-methyl-6-phytyl-1,4-hydroquinone chloroplastic GN= 106300824	299.63	1.75962	23	9	9
A0A0D3A5M6	Cystine lyase CORI3-like GN= 106313559	167.94	1.60011	17	5	4
A0A0D3C3H0	Fructokinase-1 GN= 106339265	41.25	1.60875	8	1	1
A0A0D3CPS1*	Formate--tetrahydrofolate ligase GN= 106300060	486.51	1.92518	13	6	6
A0A0D3DCA0	GDP-mannose 3,5-epimerase GN= N/A	154.04	1.642	13	5	5
A0A0D3E5R1	Prolycopene chloroplastic GN=106318506	32.67	13.791	4	1	1
A0A0D3CU91*	STRICTOSIDINE SYNTHASE-LIKE 9-like GN= 106300854	330.25	1.30053	11	3	3
	Aminoacid Metabolism
A0A0D3A332	Glutamine amidotransferase YLR126C GN= 106306562	22.38	1.86645	5	1	1
A0A0D3A152	Serine hydroxymethyltransferase mitochondrial GN= 106314004/106300539 (EC 2.1.2.1)	295.58	1.59741	69	38	5
A0A0D3CZT9		34.47	3.64284	25	11	2
A0A0D3BZG9	Glutamine synthetase cytosolic isozyme 1-1 GN= N/A (EC 6.3.1.2)	131.48	1.93672	36	8	1
A0A0D3A5F0	Gamma-glutamylcysteine synthetase GN= 106311424	286.96	1.71978	19	7	7
A0A0D3EEL1	5-methyltetrahydropteroyltriglutamate--homocysteine methyltransferase 1-like GN= N/A	110.07	4.05348	28	19	1
A0A0D3BJI3	Alanine--glyoxylate aminotransferase 2 homolog mitochondrial GN= N/A	118.48	1.67638	13	3	3
	PROTEIN BIOSYNTHESIS, FOLDING, ASSEMBLY, FATE AND DEGRADATION
A0A0D3AL95	26S protease regulatory subunit 6B homolog GN= 106327908	90.81	2.23176	13	4	3
A0A0D3A4W0	BAG family molecular chaperone regulator 7-like GN= N/A	31.95	80.8793	4	1	1
A0A0D3AY81*	Calnexin homolog 1-like GN= 106327296	49.76	1.65355	8	4	1
A0A0D3CJV9	Cyclophilin-like peptidyl-prolyl cis-trans isomerase family GN= 106343298	181.43	1.59126	16	5	5
A0A0D3DAR1	Heat shock protein 83-like GN= N/A	291.91	1.59527	11	5	5
A0A0D3D4R1*	Heat shock protein 83-like GN= 106318729	39.44	1.67182	3	1	1
A0A0D3C2P6*	Histone H4 GN= 106328643/106296925	889.38	1.74667	50	9	9
A0A0D3D0R1*	NAD(P)H-quinone oxidoreductase subunit O, chloroplastic GN= 106298212	110.59	1.90528	18	2	2
A0A0D3AK98	T-complex 1 subunit beta-like GN= 106327025	105.02	3.01697	12	4	4
A0A0D3E032	Translocon at the outer envelope membrane of chloroplasts 159 GN= 106317302	41.66	2.1495	2	2	2
A0A0D3C2G7*	Uncharacterized protein (Fragment) GN= N/A	70.79	2.20174	25	20	1
	Transcription, Translation, pos-translational and Transduction process
A0A0D3A622	31 kDa chloroplastic GN= 106337557	520.17	2.05218	35	10	1
A0A0D3AFK9	40S ribosomal S3a GN= N/A	871.57	1.50953	31	17	4
A0A0D3CL16	40S ribosomal S5-1-like GN= 106295787	218.02	4.40026	28	6	6
A0A0D3B6F7	50S ribosomal L3- chloroplastic GN= 106335401	111.62	3.44142	20	4	4
A0A0D3BDA5	60S ribosomal L5-1-like GN= 106335414	431.39	1.6931	42	10	10
A0A0D3CLN1	60S ribosomal L4-1-like GN= 106295520	349.43	1.88431	23	6	6
A0A0D3CEL8	Glycine--tRNA ligase mitochondrial GN= 106295514	101.36	1.9192	6	3	3
A0A0D3E141	Histone GN= 106317918	31.92	2.55293	14	2	1
A0A0D3C8T6	Leucine--tRNA cytoplasmic GN= N/A	24.36	36.6541	2	1	1
	PHOTORESPIRATION, CHLOROPLASTIC AND PHOTOSYNTHESIS PROCESS
A0A0D3DKI8*	50S ribosomal protein L21, chloroplastic GN= 106307810	93.28	1.90111	22	3	2
A0A0D3BR44	Aldo-keto reductase family 4 member C8 GN= AKR4C8 (EC 1.1.1.-)	112.32	1.95774	15	3	3
A0A0D3AQH8	Geranylgeranyl diphosphate reductase, chloroplastic GN= CHLP (EC 1.3.1.83)	273.12	1.85911	24	7	7
A0A0D3A6Y4*	NADPH-protochlorophyllide oxireductase chloroplastic GN= N/A	46.64	2.50848	20	3	1
A0A0D3BZB9	Phosphoglycolate phosphatase 1B, chloroplastic GN= PGLP1B (EC 3.1.3.18)	123.36	3.63398	22	4	4
A0A075M3S9	Ribulose bisphosphate carboxylase small chain GN= RBCS (EC 4.1.1.39)	197.12	6.71152	71	25	2
A0A191SEW5	Ribulose bisphosphate carboxylase large chain GN= RBCL (EC:4.1.1.39)	160.34	5.46701	72	109	3
A0A0D3AAQ4*	Chlorophyll a-b binding protein, chloroplastic GN=106313125	286.18	1.63788	41	13	2
A0A0H3Y313*	Cytochrome b559 subunit alpha (PSII reaction center subunit V) GN= PSBE	145.71	1.80505	27	2	2
A0A0D3DYQ1	Oxygen-evolving enhancer protein 2, chloroplastic isoform X1 GN= PSBP1	931.01	3.6485	48	18	4
A0A0D3DNC9*	Photosystem I reaction center subunit IV A, chloroplastic-like GN= 106312628	3382.25	1.63081	61	28	13
A0A0D3B7J6	Thylakoid lumenal 19 kDa protein, chloroplastic GN= TEL3S	107.15	1.61986	21	3	3
	DISEASE/DEFENSE RESPONSE
A0A0D3B249	20 kDa chloroplastic GN= 106317960	31.41	22.2499	53	13	1
A0A0D3EHU5	Assimilatory sulfite reductase (ferredoxin) chloroplastic GN= 106318512	64.35	2.27028	17	7	2
A0A0D3A7F3	ATP-dependent Clp protease proteolytic subunit-related chloroplastic-like GN-=106322440	123.44	1.57394	16	4	4
A0A0D3DDE4	Calcium sensing chloroplastic GN= 106306967	604.63	1.76278	38	11	11
A0A0D3DV31	Calvin cycle CP12- chloroplastic GN= 106311951	63.4	2.49348	38	2	2
A0A0D3A3L4*	Elongation factor Ts, mitochondrial, EF-Ts, EF-TsMt GN= EFTS/106304797	364.61	1.69699	8	6	5
A0A0D3AXH2*	Elongation factor 2 GN= 106326803	915.66	1.58437	19	14	14
A0A0D3D1P0*	Epidermis-specific secreted glycoprotein EP1-like GN= 106300578	238.63	1.80361	16	5	5
A0A0D3B244	Germin subfamily 3 member 3 GN= 106329205	118.37	1.60836	43	12	1
A0A0D3CVZ5	Glutathione S-transferase U19 GN= 106301073	262.28	1.75081	31	5	5
A0A0D3DVQ0	Leucine aminopeptidase 1 GN= 106312505	103.24	1.94182	22	8	2
A0A0D3BMP0	Mitochondrial-processing peptidase subunit alpha-1 GN= 106336387	250.51	1.52495	15	7	1
A0A0D3E1R0	Quinone oxidoreductase GN= 106313038	87.36	2.11336	13	3	3
A0A0D3DLN8	Selenium-binding 1 GN= 106312666	90.6	1.50136	9	3	2
Q93XC4	Thiocyanate methyltransferase 2 GN= TMT2 (EC 2.1.1.n4)	37.56	2.54926	8	1	1
A0A0D3CPM5*	Tubulin alpha chain GN= N/A	555.28	1.64852	20	8	3
	Oxidative stress
Q43404	1-aminocyclopropane-1-carboxylate oxidase GN= N/A	74.21	2.09903	10	2	2
A0A0D2ZUH9	Glyoxylate succinic semialdehyde reductase 1 GN= N/A	399.21	2.22465	45	10	10
	Pathogen-related
A0A0D3CQU9	Epithiospecifier -like GN= 106296341	230.99	1.56059	29	6	5
A0A0D3CKB5	GDSL esterase lipase ESM1 GN=106292913	31.19	3.51853	18	4	1
A0A0D2ZVR5	Nascent polypeptide-associated complex subunit alpha 4 N/A	66.88	4.31483	26	2	2
A0A0D3A9D2	Peroxidase GN= 106315162 (EC 1.11.1.7)	148.94	2.06726	15	3	3
A0A0D3CMR7	Ribose-5-phosphate isomerase chloroplastic GN= 106343538	158.81	1.93471	52	15	3
	TRANSPORT
A0A0D3E5C1*	ADP-ribosylation factor 1-like GN= 106313183	346.02	1.49409	45	8	8
A0A0D3E873	ATP synthase gamma chain chloroplastic GN= 106335613	37.87	11.4175	54	25	1
Q42642	Lipid transfer GN= WAX9B	46.55	2.07084	14	1	1
A0A0D3AE96	Nascent polypeptide-associated complex subunit alpha 1 GN= 106335439	30.06	11.7119	18	3	1
A0A0D3BAX8		159.56	2.0988	28	5	3
Q42641	Non-specific lipid-transfer A GN= WAX9A	109.25	2.12841	31	3	3
A0A0D3AY57*	SNAP25 homologous SNAP33 GN= 106322715	20.45	1.78481	4	2	2
A0A0D3BHM3*	TOC75-3, chloroplastic GN= 106335044	1456.06	1.50041	34	20	20
	DNA and RNA BINDING/ASSEMBLY
A0A0D3DCM6*	DEAD-box ATP-dependent RNA helicase 3B, chloroplastic GN= N/A	144	1.69738	8	3	3
	ORGANIZATION, HOMEOSTASIS, MODIFICATION AND REPAIR
A0A0D3D1E1	Disulfide isomerase GN= 106300838/106306794/106312445 (EC 5.3.4.1)	140.37	1.77402	18	5	5
A0A0D3D7M0		38.22	2.49602	12	3	2
A0A0D3DQU3		139.75	1.79305	15	4	3
A0A0D3C7P2	Uncharacterized protein GN= 106295347	52.27	2.9148	11	2	2
A0A0D3CLL4	Cell division control 48 homolog A GN= 106294350	506.45	1.96229	25	16	16
A0A0D3DU98*	Pectinesterase GN= N/A, EC 3.1.1.11	115.58	2.96239	17	2	2
	DEVELOPMENT GROWTH AND REPRODUCTOTION PROCESS
A0A0D3CWI9	Glycine--tRNA ligase chloroplastic partial GN= N/A	28.92	13.8742	2	1	1
	NO INFORMATION
A0A0D3C872	AC067971_24ESTs gb GN= 106343639	78.48	1.9696	8	2	2
A0A0D3BK51	Ankyrin repeat domain-containing 2A-like GN= N/A	70.53	2.19776	13	2	2
A0A0D3CA22	Apyrase 5 GN= 106295086	35.09	9.95159	6	1	1
A0A0D3B743	Calvin cycle CP12- chloroplastic-like GN= 106328408	76.56	2.35294	38	3	3
A0A0D3DJA5	Tropinone reductase homolog At1g07450 GN= 106308099	32.38	3.76537	6	1	1
A0A0D3DPH1	Polyamine aminopropyl partial GN= 106307915	66.84	2.22818	11	2	2
A0A0D3EGY8	PREDICTED: protein LOC106422732 GN= 106318035	43.83	2.01587	32	2	2
A0A0D3BQG5*	Ribulose bisphosphate carboxylase oxygenase chloroplastic-like isoform X2 GN= 106342672	30.52	2.17436	50	43	1
A0A0D3AJG1	Rubredoxin family GN= 106322559	266.54	1.52289	35	7	7
A0A0D3CJW9*	Stem-specific TSJT1-like GN= 106294674	94.68	1.55013	6	1	1
A0A0D3EHT3*	Uncharacterized protein SYNPCC7002_A1590-like GN= 106296895	90	1.84373	8	1	1
A0A0D3AJG1*	Uncharacterized protein LOC106322559 GN= 106322559	1202.73	1.6059	40	12	12
A0A0D3DXC5*	Uncharacterized protein GN= N/A	20.59	1.75364	1	1	1
*Protein identified in chloroplast enriched samples
GN: gene name according to Uniprot database; the symbol (/) indicates two accession numbers for the same protein
GO: Gene Ontology
